# Supplementary material
Source: publisher figshare collection journal article supplement (https://tandf.figshare.com/ndownloader/files/15549314)
Supplement: Supplementary file 1 [file 15549314]

The iADAPTS system is a mobile health system is designed to support remote delivery of meta-cognitive strategy training for community-dwelling people with chronic stroke. This system consists of a **cross-platform mobile application** for the patient and **web-based portal** for the therapist. Both components are connected through secure web-channel with two-way communication capability and all transmitted data are stored in backend server.

The **mobile application** has two modules: the *strategy worksheet* and the *general strategy*. The purpose of the *strategy worksheet module* is to guide the patient through the global Goal-Plan-Do-Check strategy as they work toward the self-selected goal. The patient views a list of pre-defined goals, which were selected by the patient and discussed with the therapist, and applies the global strategy to each goal. The worksheet guides the patient through each step of the strategy, including when to specify or revise the plan, when to report the result of the plan, and prompts the patient to evaluate/check the performance of the plan. The worksheet also prompts the patient to report an anticipated performance score before the plan is carried out and an actual performance score after the plan is carried out. Following this worksheet, the module guides the patient through multiple iterations until the patient determines that the goal is accomplished. The purpose of the *general strategy module* is to help the patient understand the strategy training process as it appears in the mobile application. This module contains a description of each step of the global strategy (Goal-Plan-Do-Check), examples of each step, and multimedia resources.

The therapist uses the **web-based portal** to initiate the intervention by recording the patients’ self-selected goals which were determined during a face-to-face session. For each goal, the therapist monitors each iteration of global strategy through the web-based portal. In light of the remote nature of the intervention, the development team collaborated with occupational therapists who have expertise in strategy training to identify a therapist control mechanism that would support participant safety. Once a patient has entered a new plan into the mobile application, the therapist views the plan and assesses safety considering the patient’s level of function and available social support. The therapist may then approve the plan and allow the patient to proceed, or reject the plan and use built-in communication features to collaboratively identify a safe plan with the patient. Once a safe plan is established, the therapist may release the goal and allow the patient to proceed.

To enhance the interactivity, iADAPTS system is equipped with notification and secure instant messaging. Every update performed on the web-based portal which is related to the patient will trigger a notification that pushes to the patient’s device. Meanwhile, any data submitted by the patient which requires therapist’s attention will trigger a notification and send it to therapist’s email. In addition, the iADAPTS system offers a secure channel to patient for exchanging messages with his/her therapist built into the mobile application. This feature provides a convenient and secure method for both the patient and therapist to receive, review, and respond to messages through the mobile application and web-based portal.

As a cross-platform mobile application, the iADAPTS application can be used with both android and iOS-based mobile devices. It also supports different form-factors of the devices, including phone and tablet. This approach is expected to expand the coverage and the flexibility in implementing the intervention.
